# Supplementary material
Source: PubMed Central journal article supplement (PMC3558862)
Supplement: supp_112.049395_Supplemental_Tables_DMD_Final.pdf [file supp_112.049395_Supplemental_Tables_DMD_Final.pdf]

**Alteration of the Expression of Pesticide-Metabolizing Enzymes in Pregnant Mice:  
Potential Role in the Increased Vulnerability of the Developing Brain**

Marie C. Fortin, Lauren M. Aleksunes, Jason R. Richardson

**Drug Metabolism and Disposition**

**Supplemental Table 1. Gene names, RefSeq IDs and corresponding human orthologs.**

| <b>Mouse Gene</b>                     | <b>Mouse Gene Transcript ID</b> | <b>Human Gene</b> |
|---------------------------------------|---------------------------------|-------------------|
| <b>Cytochromes P450s</b>              |                                 |                   |
| Cyp1a2                                | NM_009993.3                     | CYP1A2            |
| Cyp2b10                               | NM_009999.3                     | CYP2B6            |
| Cyp2d22                               | NM_001163472.1                  | CYP2D6            |
| Cyp2c37                               | NM_010001.2                     | CYP2C19           |
| Cyp2c50                               | NM_134144.2                     | CYP2C19           |
| Cyp2c54                               | NM_206537.2                     | CYP2C19           |
| Cyp3a11                               | NM_007818.3                     | CYP3A4            |
| Cyp3a16 ( <i>juvenile</i> )           | NM_007820.2                     | CYP3A4            |
| Cyp3a44 ( <i>female</i> )             | NM_177380.3                     | CYP3A4            |
| Cyp3a41a/b ( <i>female</i> )          | NM_017396.2/<br>NM_001105159.1  | CYP3A4            |
| Cyp3a13                               | NM_007819.4                     | CYP3A7            |
| Cyp2d22                               | NM_019823.4                     | CYP2D6            |
| <b>Carboxylesterases</b>              |                                 |                   |
| Ces1d ( <i>Ces3</i> )                 | NM_053200.2                     | CES1              |
| Ces1g ( <i>Ces1, Es/x</i> )           | NM_021456                       | CES1              |
| Ces1c ( <i>Es1, Est-N, EsN, Es4</i> ) | NM_007954.4                     | CES1              |
| Ces1e ( <i>Es22 (egasyn)</i> )        | NM_133660.3                     | CES1              |
| Ces2e ( <i>Ces5</i> )                 | NM_172759.3/                    | CES2              |

NM\_001163756.1

Ces2c (*Ces2*,

*Ces2a3*)

NM\_145603.1

CES2

*Ces2a* (*Ces6*)

NM\_133960.4

CES2

*Ces3a/b* (*Es31*)

NM\_198672.1

CES3

**Paraoxonase**

Pon1

NM\_011134.3

PON1

**Nuclear receptors**

AhR

NM\_013464.4

AHR

Nr1i3 (*Car*)

NM\_009803

CAR

Ppara

NM\_011144.6

PPAR $\alpha$

Nr1i2 (*Pxr*)

AF031814

PXR

Rxra

NM\_011305

RXR $\alpha$

Nr1h4 (*Fxr*)

NM\_001163504

NR1H4 (*Fxr*)

Nr1h2 (*Lxr*)

NM\_009473.2

NR1H2 (*Lxr*)

Hnf4 $\alpha$

NM\_008261.2

HNF4 $\alpha$

**Normalizers**

$\beta$ -actin

NM\_007393

$\beta$ -ACTIN

Gapdh

NM\_008084

GAPDH

---

---

**Supplemental Table 2. Statistical outcomes (p-values) of the paired comparisons (t-test) of the different GD and PD groups to the corresponding virgin mice group.**

|                                | <b>GD7</b>   | <b>GD11</b>  | <b>GD14</b>  | <b>GD17</b>  | <b>PD1</b>   | <b>PD15</b>  | <b>PD30</b>  |
|--------------------------------|--------------|--------------|--------------|--------------|--------------|--------------|--------------|
| <b>Cyp1a2</b>                  | <b>0.016</b> | <b>0.008</b> | <b>0.029</b> | 0.798        | 0.743        | 0.281        | 0.900        |
| <b>Cyp2b10</b>                 | 0.105        | 0.111        | 0.080        | 0.385        | 0.100        | <b>0.017</b> | 0.399        |
| <b>Cyp2d22</b>                 | 0.136        | <b>0.002</b> | <b>0.047</b> | 0.118        | 0.600        | <b>0.018</b> | 0.475        |
| <b>Cyp2c37</b>                 | 0.685        | <b>0.010</b> | <b>0.005</b> | <b>0.029</b> | 0.967        | 0.115        | 0.365        |
| <b>Cyp2c50</b>                 | <b>0.045</b> | <b>0.001</b> | <b>0.003</b> | <b>0.016</b> | <b>0.019</b> | <b>0.014</b> | 0.162        |
| <b>Cyp2c54</b>                 | <b>0.044</b> | <b>0.001</b> | <b>0.003</b> | 0.068        | 0.170        | 0.842        | 0.642        |
| <b>Cyp3a11</b>                 | <b>0.008</b> | <b>0.020</b> | <b>0.008</b> | <b>0.031</b> | <b>0.030</b> | <b>0.022</b> | <b>0.034</b> |
| <b>Cyp3a13</b>                 | 0.656        | 0.149        | 0.083        | <b>0.018</b> | 0.636        | 0.057        | 0.097        |
| <b>Ces1c</b>                   | 0.736        | 0.080        | 0.095        | 0.267        | 0.787        | 0.698        | 0.276        |
| <b>Ces1d</b>                   | 0.858        | <b>0.039</b> | 0.105        | 0.611        | 0.747        | <b>0.003</b> | 0.179        |
| <b>Ces1e</b>                   | <b>0.016</b> | 0.255        | 0.466        | 0.473        | 0.100        | 0.703        | 0.382        |
| <b>Ces1g</b>                   | 0.959        | 0.160        | 0.073        | 0.153        | 0.202        | 0.966        | 0.589        |
| <b>Ces2a</b>                   | <b>0.018</b> | <b>0.004</b> | <b>0.003</b> | 0.058        | 0.414        | 0.681        | 0.516        |
| <b>Ces2c</b>                   | 0.251        | 0.705        | 0.523        | 0.171        | 0.154        | 0.156        | <b>0.047</b> |
| <b>Ces2e</b>                   | 0.080        | 0.846        | 0.900        | 0.070        | 0.311        | 0.931        | 0.401        |
| <b>Pon1</b>                    | 0.902        | 0.979        | 0.084        | 0.922        | 0.703        | 0.544        | 0.764        |
| <b>Cyp3a16</b>                 | <b>0.001</b> | <b>0.001</b> | <b>0.004</b> | <b>0.015</b> | <b>0.011</b> | <b>0.001</b> | 0.089        |
| <b>Cyp3a41a/b</b>              | <b>0.030</b> | 0.053        | 0.121        | <b>0.001</b> | <b>0.027</b> | <b>0.001</b> | <b>0.023</b> |
| <b>Cyp3a44</b>                 | <b>0.001</b> | <b>0.014</b> | <b>0.014</b> | <b>0.002</b> | <b>0.011</b> | <b>0.001</b> | <b>0.007</b> |
| <b>Hnf4<math>\alpha</math></b> | 0.340        | 0.211        | 0.698        | 0.257        | 0.885        | 0.302        | 0.479        |

|              |       |       |       |              |              |       |       |
|--------------|-------|-------|-------|--------------|--------------|-------|-------|
| <b>Ppara</b> | 0.209 | 0.096 | 0.275 | <b>0.043</b> | <b>0.022</b> | 0.332 | 0.855 |
| <b>Gr</b>    | 0.733 | 0.673 | 0.418 | 0.769        | 0.574        | 0.052 | 0.549 |
| <b>Pxr</b>   | 0.546 | 0.283 | 0.581 | 0.823        | 0.552        | 0.874 | 0.273 |
| <b>Car</b>   | 0.708 | 0.075 | 0.054 | 0.060        | 0.594        | 0.308 | 0.443 |
| <b>Ahr</b>   | 0.256 | 0.484 | 0.402 | 0.328        | 0.138        | 0.247 | 0.773 |
| <b>Rxra</b>  | 0.664 | 0.466 | 0.765 | 0.849        | 0.911        | 0.267 | 0.996 |
| <b>Fxr</b>   | 0.087 | 0.876 | 0.673 | 0.897        | 0.790        | 0.108 | 0.080 |
| <b>Lxr</b>   | 0.418 | 0.854 | 0.651 | 0.263        | 0.759        | 0.105 | 0.513 |

---
